# Supplementary material for: pH-Triggered nanostructural transformations in antimicrobial peptide/oleic acid self-assemblies
Source: Royal Society of Chemistry journal article supplement (doi:10.1039/c7bm00929a), 2018-01-01
Supplement: c7bm00929a1.pdf [file c7bm00929a1.pdf]

## Supporting information

### pH-Triggered Nanostructural Transformations in Antimicrobial Peptide-Oleic

#### Acid Self-Assemblies

*Mark Gontsarik<sup>a,b</sup>, Mahsa Mohammadtaheri<sup>a</sup>,*

*Anan Yaghmur<sup>b</sup>, Stefan Salentinig<sup>a\*</sup>*

<sup>a</sup>Laboratory for Biointerfaces, Department Materials meet Life, Empa Swiss Federal  
Laboratories for Materials Science and Technology, Lerchenfeldstrasse 5, 9014, St.

Gallen, Switzerland

<sup>b</sup>Department of Pharmacy, Faculty of Health and Medical Sciences, University of  
Copenhagen, Universitetsparken 2, DK-2100 Copenhagen Ø, Denmark.

### Dynamic light scattering (DLS) cumulant analysis

The average diffusion coefficient  $D$  was obtained by the cumulant analysis from the correlation functions.<sup>1</sup> The hydrodynamic radius  $R_H$  was deduced from the diffusion coefficient using the Stokes-Einstein equation:

$$R_H = \frac{k_B T}{6\pi\eta D} \quad (\text{eq. SI1})$$

$k_B$  being the Boltzmann constant,  $T$  the absolute temperature and  $\eta$  the viscosity of the solvent. The polydispersity index  $PDI$  of the size distribution is determined from the second cumulant:

$$PDI = \frac{\mu_2}{\bar{\Gamma}^2} \quad (\text{eq. SI2})$$

$\mu_2$  being the second cumulant and  $\bar{\Gamma}$  the mean of the inverse decay time.

### Phase indexing and lattice parameter calculations from SAXS data

The curves exhibiting peak spacing of  $1, \sqrt{3}, \sqrt{4}$ , corresponding to reflections from planes defined by Miller indices  $hk = 10, 11, 20$ , were attributed to  $H_2$  inverse hexagonal phase and spacing of  $\sqrt{3}, \sqrt{8}, \sqrt{11}, 4, \sqrt{19}$ , corresponding to reflections from  $hkl = 111, 220, 311, 400, 331$  planes, were attributed to  $Fd3m$  micellar cubic phase. Lattice parameter  $a$  for the two phases were calculated using:

$$a_{H_2} = \frac{2d}{\sqrt{3}} \sqrt{h^2 + hk + k^2} \quad (\text{eq. SI3})$$

$$a_{Fd3m} = d \sqrt{h^2 + k^2 + l^2} \quad (\text{eq. SI4})$$

where  $d$  is the interplanar distance given by  $d = 2\pi/q$ .

### Fitting of pK<sub>a</sub> from the ζ –potential measurements

The ζ –potential measurements at different pH values for samples with 0%, 10% and 20% LL-37 in OA were fitted using following equation derived from the Handerson-Hasselbalch relation.

$$\zeta = Z1 + \frac{Z1 - Z2}{10^{(pK_a^{app} - pH) * p} + 1} \quad (\text{eq. SI5})$$

where the fitting parameters Z1 and Z2 are the bottom and top asymptotes,  $pK_a^{app}$  is the apparent pK<sub>a</sub> and  $p$  is the hill slope.

| LL-37 loading in OA<br>at pH = 7.0 [wt%] | $R_H$<br>[nm] | PDI  | LL-37 loading in OA<br>at pH = 7.5 [wt%] | $R_H$<br>[nm] | PDI  |
|------------------------------------------|---------------|------|------------------------------------------|---------------|------|
| 0                                        | 133           | 0.14 | 0                                        | 129           | 0.14 |
| 5                                        | 164           | 0.20 | 5                                        | 164           | 0.20 |
| 10                                       | 151           | 0.19 | 10                                       | 162           | 0.25 |
| 20                                       | 190           | 0.24 | 20                                       | 105           | 0.48 |
| 30                                       | 105           | 0.35 | 30                                       | 94            | 0.50 |

**Table S11.**  $R_H$  and PDI values from the cumulant analysis of the DLS data from OA/LL-37 emulsions with varying loading of LL-37 in OA at pH 7.0 and pH 7.5,  $R_H$  presented in graphical form in Figure SI2 and SI3, respectively.

| 10 wt% LL-37 in OA |            |      |
|--------------------|------------|------|
| pH                 | $R_H$ [nm] | PDI  |
| 6.0                | 133        | 0.13 |
| 6.5                | 176        | 0.19 |
| 7.0                | 151        | 0.18 |
| 7.5                | 162        | 0.25 |
| 7.7                | 124        | 0.44 |
| 8.5                | 73         | 0.56 |

| 30 wt% LL-37 in OA |            |      |
|--------------------|------------|------|
| pH                 | $R_H$ [nm] | PDI  |
| 6.0                | 151        | 0.36 |
| 6.5                | 155        | 0.32 |
| 7.0                | 105        | 0.35 |
| 7.5                | 94         | 0.50 |
| 7.7                | 57         | 0.51 |
| 8.5                | 31         | 0.47 |

**Table S12.**  $R_H$  and PDI values from the cumulant analysis of the DLS data from OA/LL-37 emulsions at varying pH between 6.0 and 8.5 at constant LL-37 loading of 10 and 30 wt% in OA,  $R_H$  presented in graphical form in Figure 4 and SI6, respectively.

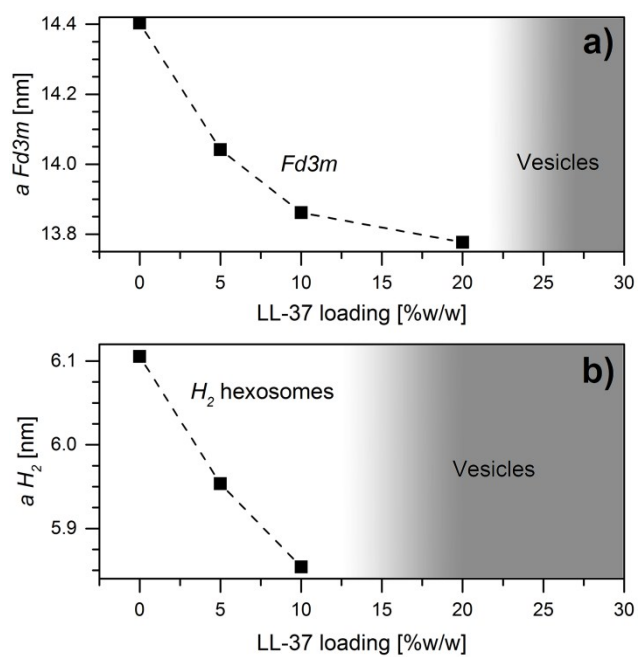

**Figure S11.** Calculated lattice parameters for the  $Fd3m$  and  $H_2$  phase upon increasing the LL-37 concentration relative to OA at a) pH 7.0 and b) pH 7.5. The corresponding SAXS curves are shown in Figure 1 in the main manuscript.

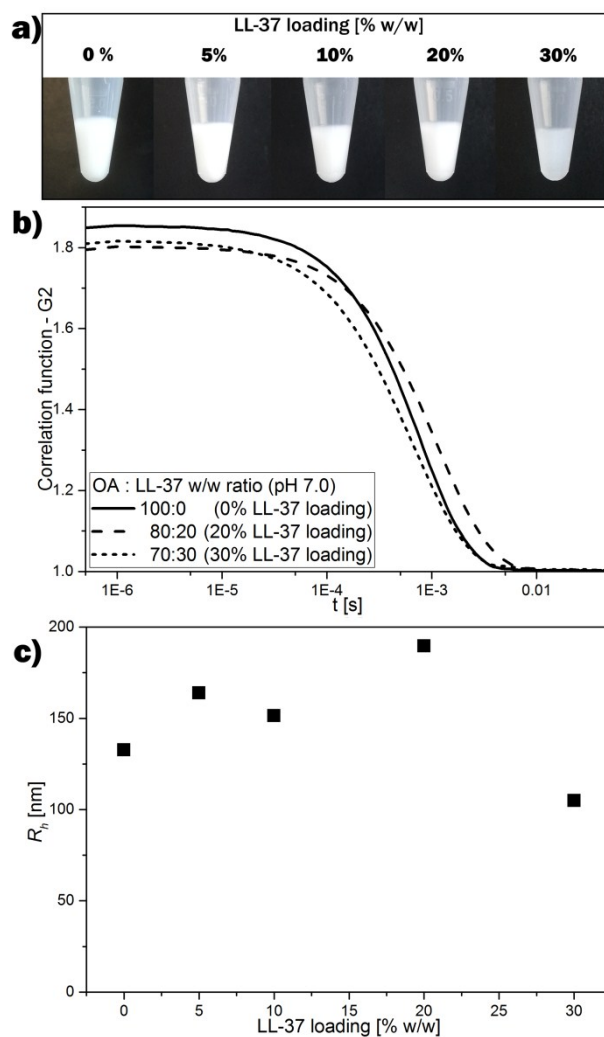

**Figure S12.** a) Pictures of the OA/LL-37 dispersions at pH 7.0 with increasing LL-37 concentration relative to OA showing the decrease in turbidity of the samples with increasing peptide concentration. b) DLS correlation functions for these dispersions; and c) the corresponding  $R_H$  values from cumulant analysis of these correlation functions.

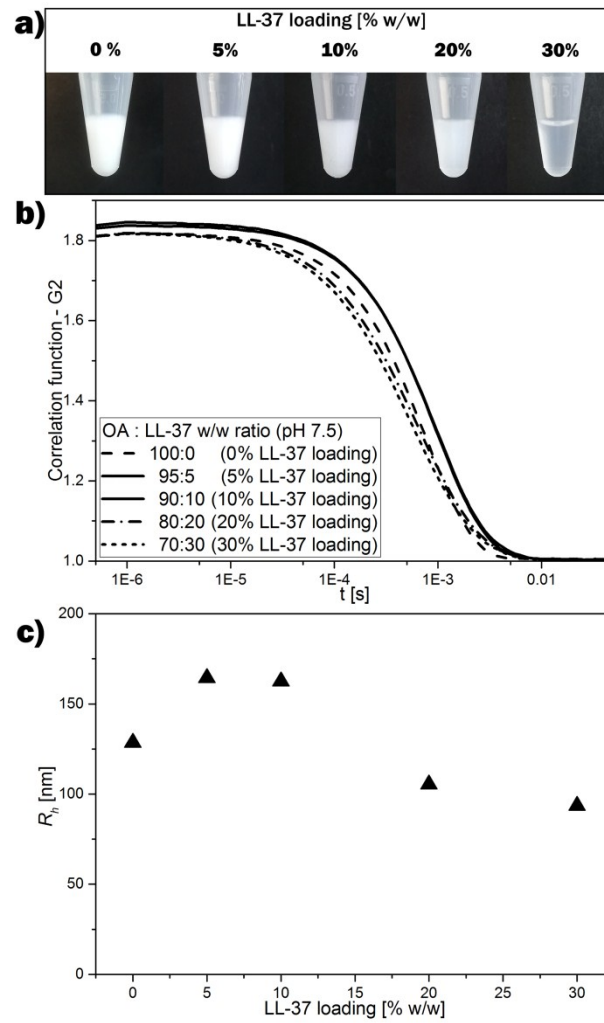

**Figure S13.** a) Images of the OA/LL-37 dispersions at pH 7.5 with increasing LL-37 concentration relative to OA showing the decrease in turbidity of the samples with increasing peptide concentration. b) DLS correlation functions for these dispersions; and c) The corresponding  $R_H$  values from cumulant analysis of the correlation functions in b)

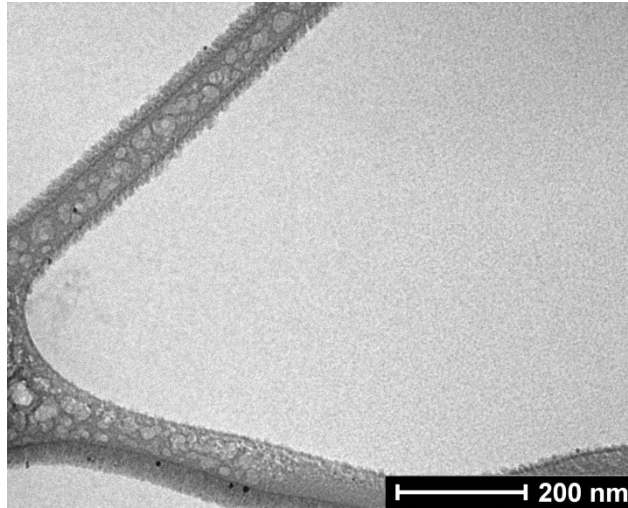

**Figure SI4.** Representative cryo-TEM image of 10 mg/ml LL-37 in PBS buffer in absence of OA. No Nanoobjects in the 10 nm size range were observed in this system. The dark region in this image is the TEM grid.



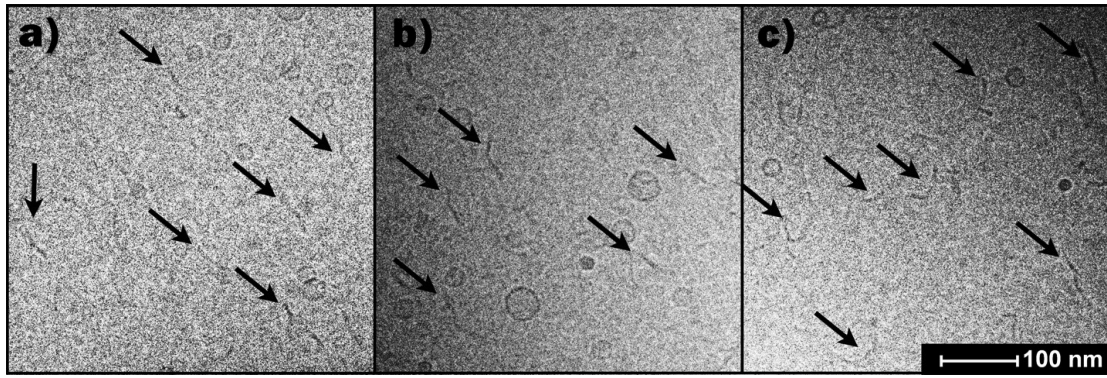

**Figure S15.** Representative cryo-TEM image of the OA/LL-37 dispersion containing 30 wt% LL-37 in OA at pH 8.5. Cylindrical micelles and/or bilayer fragments (marked with arrows) coexisting with small vesicles.

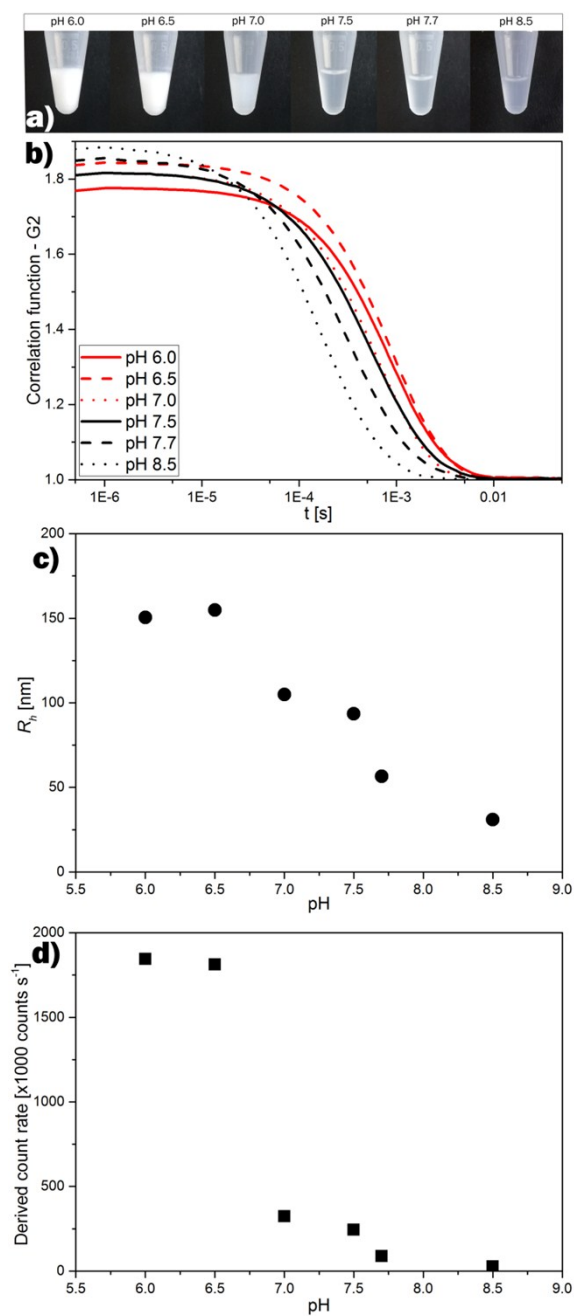

**Figure SI6.** a) Images of the OA/LL-37 dispersions at 30 wt% LL-37 in OA at different pH values from 6 to 8.5 showing the decrease in turbidity of the samples with increasing pH due to decrease in particle size. b) DLS correlation functions for these dispersions; c) the corresponding  $R_H$  values from cumulant analysis of the correlation functions; and d) The corresponding light scattering intensity in this pH range.

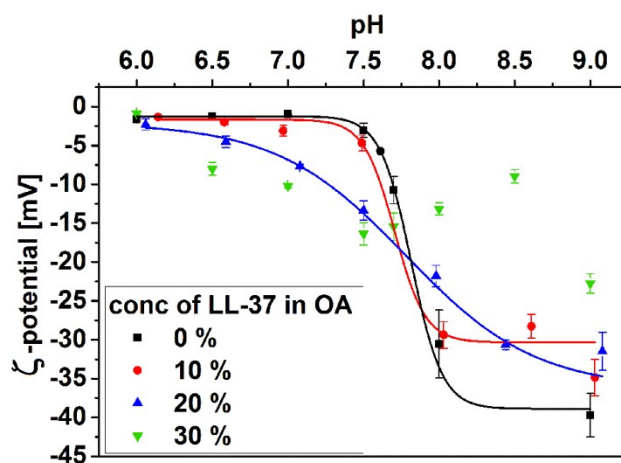

**Figure SI7.** pH-triggered modification of the  $\zeta$  -potential of OA-based nanocarriers with different LL-37 loading (wt% relative to OA). The pH-induced changes in  $\zeta$  -potential for samples with 0 wt%, 10 wt% and 20 wt% LL-37 loading in OA were fitted using Eq. SI5. The resulting  $pK_a^{app}$  values were  $7.82 \pm 0.10$  (black curve),  $7.70 \pm 0.18$  (red curve) and  $7.78 \pm 0.12$  (blue curve) with increasing LL-37 content.

## REFERENCES

1. S. R. Aragón and R. Pecora, *J. Chem. Phys.*, 1976, **64**, 2395.
